# Supplementary material
Source: publisher site journal article supplement (https://thieme-connect.com/media/10.1055-s-00035024/201709/supmat/10-1160-th17-04-0259-supp.pdf)
Supplement: Supplementary file 1 [file 10-1160-th17-04-0259-supp.pdf]

**Supplementary Material to Koniecznyńska, Bryk, et al. “Interplay between elevated cellular fibronectin and plasma fibrin clot properties in type 2 diabetes” (<https://doi.org/10.1160/TH17-04-0259>)**

Suppl. Table 1 Clot properties in patients with type 2 diabetes and cardiovascular disease (CVD)

| Variables                               | Diabetic patients<br>(n=200) | Control<br>subjects<br>(n=100) | p-value | Diabetic patients with CVD<br>(n=127) | Diabetic patients without<br>CVD<br>(n=73) | p-value  |
|-----------------------------------------|------------------------------|--------------------------------|---------|---------------------------------------|--------------------------------------------|----------|
| $K_s, \times 10^{-9} \text{cm}^2$       | 7.0 (6.5-7.5)                | 6.9 (6.2-7.4)                  | 0.005*  | 7.0 (6.2-7.5)                         | 7.3 (6.9-7.5)                              | <0.001** |
| Lag <sub>C</sub> , s                    | 279 (223-352)                | 321 (315-327)                  | <0.001* | 264 (218-341)                         | 305 (234-374)                              | 0.07**   |
| Lag <sub>L</sub> , s                    | 277 (232-352)                | 328 (322-338)                  | <0.001* | 262 (231-344)                         | 306 (237-371)                              | 0.05**   |
| MaxAbs <sub>C</sub> , au                | 0.34 (0.33-0.35)             | 0.33 (0.32-0.33)               | <0.001* | 0.34 (0.33-0.36)                      | 0.33 (0.32-0.34)                           | <0.001** |
| MaxAbs <sub>L</sub> , au                | 0.31 (0.29-0.33)             | 0.31 (0.29-0.31)               | 0.044*  | 0.31 (0.30-0.33)                      | 0.30 (0.29-0.32)                           | 0.005**  |
| CR <sub>C</sub> , $\times 10^{-4}$ au/s | 2.76 (2.39-2.98)             | 2.38 (2.17-2.49)               | <0.001* | 2.75 (2.43-2.97)                      | 2.78 (2.21-3.01)                           | 0.6**    |
| CR <sub>L</sub> , $\times 10^{-4}$ au/s | 2.81 (2.39-3.49)             | 2.73 (2.42-2.88)               | 0.002*  | 2.82 (2.43-3.55)                      | 2.77 (2.27-3.40)                           | 0.9**    |
| Lys50 <sub>t0</sub> , s                 | 3030 (2245-3800)             | 2600 (2445-2660)               | <0.001* | 3260 (2410-3870)                      | 2780 (2070-3430)                           | 0.06**   |
| Lys50 <sub>MA</sub> , s                 | 1400 (1180-1640)             | 1200 (1100-1265)               | <0.001* | 1470 (1170-1670)                      | 1330 (1190-1530)                           | 0.8**    |
| Lys <sub>T</sub> , s                    | 6505 (5330-7860)             | 5525 (5330-5725)               | 0.005*  | 6470 (5200-8130)                      | 6520 (5420-7330)                           | 0.1**    |
| LR                                      | 0.43 (0.38-0.49)             | 0.46 (0.45-0.47)               | <0.001* | 0.45 (0.39-0.49)                      | 0.39 (0.38-0.47)                           | 0.3**    |
| AUC                                     | 844 (734-969)                | 600 (503-700)                  | <.001*  | 890 (773-983)                         | 770 (697-914)                              | 0.008**  |

\* p-value adjusted for age, obesity, smoking, high sensitivity-CRP, fibrinogen, glucose;

\*\* p-value adjusted for age, creatinine, fibrinogen and glucose.

**Supplementary Material to Koniecznyńska, Bryk, et al. “Interplay between elevated cellular fibronectin and plasma fibrin clot properties in type 2 diabetes” (<https://doi.org/10.1160/TH17-04-0259>)**

Data presented as the median and interquartile range and the p-value calculated in the Mann-Whitney’s test.  $K_s$  denotes permeation coefficient;  $Lag_C$ , clotting lag time;  $Lag_L$ , lysis lag time;  $MaxAbs_C$ , clotting maximum absorbance;  $MaxAbs_L$ , lysis maximum absorbance;  $CR_C$ , clotting clot rate;  $CR_L$ , lysis clot rate;  $Lys50_{t0}$ ,  $Lys50_{MA}$ ,  $Lys_T$ , lysis times; LR, lysis rate; AUC, area under curve.

Suppl. Table 2 Contribution of cellular fibronectin (cFn) to the variance of the turbidimetric parameters in diabetic patients.

| Variables                          | R <sup>2</sup> | p-value | R <sup>2</sup> * | p-value * |
|------------------------------------|----------------|---------|------------------|-----------|
| $K_s, \times 10^{-9} \text{cm}^2$  | 3.73%          | 0.006   | 10.19%           | 0.047     |
| $Lag_C, \text{s}$                  | 1.99%          | 0.046   | 4.98%            | 0.07      |
| $Lag_L, \text{s}$                  | 1.93%          | 0.049   | 4.09%            | 0.1       |
| $MaxAbs_C, \text{au}$              | 14.16%         | <0.001  | 18.16%           | <0.001    |
| $MaxAbs_L, \text{au}$              | 3.29%          | 0.010   | 6.56%            | 0.022     |
| $CR_C, \times 10^{-4} \text{au/s}$ | 0.04%          | 0.8     | 2.02%            | 0.6       |
| $CR_L, \times 10^{-4} \text{au/s}$ | 0.17%          | 0.6     | 3.82%            | 0.5       |
| $Lys50_{t0}, \text{s}$             | 0.56%          | 0.3     | 1.66%            | 0.7       |
| $Lys50_{MA}, \text{s}$             | 0.04%          | 0.8     | 1.64%            | 0.6       |
| $Lys_T, \text{s}$                  | 0.09%          | 0.7     | 2.15%            | 0.6       |
| LR                                 | 0.37%          | 0.4     | 2.91%            | 0.3       |
| AUC                                | 5.64%          | <0.001  | 8.64%            | 0.002     |

\* adjusted for age, fibrinogen, creatinine and glucose.

Data demonstrated as the pseudo-R<sup>2</sup> and p-value calculated in the linear regression. For abbreviations

Supplementary Material to Koniecznyńska, Bryk, et al. "Interplay between elevated cellular fibronectin and plasma fibrin clot properties in type 2 diabetes" (<https://doi.org/10.1160/TH17-04-0259>)

see Suppl. Table 1.

Suppl. Table 3 Univariate and multivariate model predictors of the lowest quartile of clot permeability (K<sub>s</sub>) and top quartile of clot density (MaxAbs<sub>C</sub>), lysis time (LysT) and area under the curve (AUC) in control subjects.

| Variables                    | Univariate OR (95% CI) | p-value | Multivariate OR (95% CI) | p-value |
|------------------------------|------------------------|---------|--------------------------|---------|
| <b>K<sub>s</sub></b>         |                        |         |                          |         |
| BMI, kg/m <sup>2</sup>       | 0.89 (0.77-1.02)       | 0.1     | -                        | -       |
| Cardiovascular disease       | 2.96 (0.91-10.49)      | 0.1     | -                        | -       |
| Angiotensin receptor blocker | 0.19 (0.01-1.42)       | 0.1     | -                        | -       |
| Hemoglobin, g/dl             | 1.34 (0.87-2.12)       | 0.2     | -                        | -       |
| INR                          | 0.002 (0.00-4.70)      | 0.1     | -                        | -       |
| Fibrinogen, g/l              | 4.27 (1.83-13.08)      | <0.001  | 12.79 (1.15-141.94)      | 0.005   |
| Creatinine, μmol/l           | 0.93 (0.88-0.98)       | 0.008   | 0.85 (0.76-0.96)         | <0.001  |
| hs-CRP, mg/l                 | 0.72 (0.49-1.01)       | 0.060   | -                        | -       |
| cFn, ug/ml                   | 65.36 (9.67-815.77)    | <0.001  | 168.40 (7.27-3900.10)    | <0.001  |
| <b>MaxAbs<sub>C</sub></b>    |                        |         |                          |         |
| Age, years                   | 1.12 (1.06-1.20)       | <0.001  | -                        | -       |

**Supplementary Material to Koniecznyńska, Bryk, et al. “Interplay between elevated cellular fibronectin and plasma fibrin clot properties in type 2 diabetes” (<https://doi.org/10.1160/TH17-04-0259>)**

Suppl. Table 3 Univariate and multivariate model predictors of the lowest quartile of clot permeability (K<sub>s</sub>) and top quartile of clot density (MaxAbsC), lysis time (LysT) and area under the curve (AUC) in control subjects.

| Variables                               | Univariate OR (95% CI) | p-value | Multivariate OR (95% CI) | p-value |
|-----------------------------------------|------------------------|---------|--------------------------|---------|
| <b>K<sub>s</sub></b>                    |                        |         |                          |         |
| Obesity                                 | 0.43 (0.12-1.40)       | 0.2     | -                        | -       |
| Smoking                                 | 8.00 (1.80-56.91)      | 0.005   | -                        | -       |
| Beta-blocker                            | 3.61 (1.12-12.75)      | 0.031   | -                        | -       |
| Statin                                  | 0.41 (0.13-1.25)       | 0.1     | -                        | -       |
| Fibrinogen, g/l                         | 4.64 (1.87-15.82)      | <0.001  | 27.57 (0.78-980.78)      | 0.007   |
| APTT                                    | 1.21 (1.03-1.46)       | 0.016   | -                        | -       |
| Alanine aminotransferase                | 0.93 (0.85-1.01)       | 0.10    | -                        | -       |
| Total cholesterol, mmol/l               | 1.02 (1.01-1.04)       | <0.001  | 1.08 (1.02-1.14)         | <0.001  |
| Low-density lipoprotein, mmol/l         | 1.04 (1.02-1.06)       | <0.001  | -                        | -       |
| High-density lipoprotein, mmol/l        | 1.09 (1.05-1.14)       | <0.001  | -                        | -       |
| Triglycerides, mmol/l                   | 1.03 (1.015-1.05)      | <0.001  | 0.95 (0.90-1.00)         | 0.018   |
| Glucose, mmol/l                         | 0.29 (0.084-0.80)      | 0.016   | -                        | -       |
| cFn ug/ml                               | 28.49 (5.72-232.74)    | <0.001  | 1679.64 (4.61-611836.5)  | <0.001  |
| <b>Lys<sub>T</sub></b>                  |                        |         |                          |         |
| Female gender                           | 0.35 (0.11-1.06)       | 0.064   | 2.90 (0.92-9.11)         | 0.064   |
| Angiotensin converting enzyme inhibitor | 0.48 (0.15-1.46)       | 0.2     | -                        | -       |

**Supplementary Material to Koniecznyńska, Bryk, et al. “Interplay between elevated cellular fibronectin and plasma fibrin clot properties in type 2 diabetes” (<https://doi.org/10.1160/TH17-04-0259>)**

Suppl. Table 3 Univariate and multivariate model predictors of the lowest quartile of clot permeability (K<sub>s</sub>) and top quartile of clot density (MaxAbsC), lysis time (LysT) and area under the curve (AUC) in control subjects.

| Variables                        | Univariate OR (95% CI) | p-value | Multivariate OR (95% CI) | p-value |
|----------------------------------|------------------------|---------|--------------------------|---------|
| <b>K<sub>s</sub></b>             |                        |         |                          |         |
| Fibrinogen, g/l                  | 1.75 (0.88-3.74)       | 0.1     | -                        | -       |
| <b>AUC</b>                       |                        |         |                          |         |
| Age, years                       | 1.11 (1.05-1.12)       | <0.001  | -                        | -       |
| Obesity                          | 0.32 (0.07-1.15)       | 0.08    | -                        | -       |
| Aspirin                          | 0.43 (0.13-1.34)       | 0.2     | -                        | -       |
| Statin                           | 0.34 (0.10-1.10)       | 0.07    | -                        | -       |
| Fibrinogen, g/l                  | 4.29 (1.89-12.45)      | <0.001  | -                        | -       |
| APTT                             | 1.53 (1.21-2.10)       | <0.001  | -                        | -       |
| Total cholesterol, mmol/l        | 1.02 (1.01-1.04)       | <0.001  | 3.19 (0.47-21.63)        | 0.035   |
| Low-density lipoprotein, mmol/l  | 1.04 (1.03-1.06)       | <0.001  | 0.31 (0.05-2.15)         | 0.039   |
| High-density lipoprotein, mmol/l | 1.07 (1.04-1.12)       | <0.001  | 0.32 (0.05-2.16)         | 0.041   |
| Triglycerides, mmol/l            | 1.03 (1.02-1.06)       | <0.001  | 0.82 (0.56-1.19)         | 0.055   |
| Glucose, mmol/l                  | 0.35 (0.10-0.99)       | 0.048   | -                        | -       |
| cFn ug/ml                        | 33.72 (5.54-351.13)    | <0.001  | 81.58 (2.27-2935.18)     | <0.001  |

Results were presented as the odds ratio (OR) and 95% confidence interval (95% CI) and p-value calculated in the logistic regression. The variables with p-value less than 0.2 in the univariate regression were included in the stepwise backwards regression minimalizing Akaike Information Criterion to establish the multivariate

**Supplementary Material to Koniecznyńska, Bryk, et al. “Interplay between elevated cellular fibronectin and plasma fibrin clot properties in type 2 diabetes” (<https://doi.org/10.1160/TH17-04-0259>)**

Suppl. Table 3 Univariate and multivariate model predictors of the lowest quartile of clot permeability (Ks) and top quartile of clot density (MaxAbsC), lysis time (LysT) and area under the curve (AUC) in control subjects.

| Variables | Univariate OR (95% CI) | p-value | Multivariate OR (95% CI) | p-value |
|-----------|------------------------|---------|--------------------------|---------|
|-----------|------------------------|---------|--------------------------|---------|

---

K<sub>s</sub>

---

model. cFn denotes cellular fibronectin; aPTT, activated partial thromboplastin time. For other abbreviations see Suppl. Table 1.
